# Supplementary material for: Histone deacetylase inhibition modulates histone acetylation at gene promoter regions and affects genome-wide gene transcription in Schistosoma mansoni
Source: PubMed Central journal article supplement (PMC5404884; doi:10.1371/journal.pntd.0005539), 2017-04-13
Supplement: pntd.0005539.s007.pdf [file pntd.0005539.s007.pdf]

## Supporting Information for

# **Histone deacetylase inhibition modulates histone acetylation at gene promoter regions and affects genome-wide gene transcription in *Schistosoma mansoni***

Letícia Anderson<sup>1,2</sup>; Monete Rajão Gomes<sup>1,2</sup>; Lucas Ferreira daSilva<sup>1,2</sup>;  
Adriana da Silva Andrade Pereira<sup>1,2</sup>; Marina M. Mourão<sup>3</sup>; Christophe Romier<sup>4</sup>;  
Raymond Pierce<sup>5</sup>; Sergio Verjovski-Almeida<sup>1,2\*</sup>

1 – Departamento de Bioquímica, Instituto de Química, Universidade de São Paulo, 05508-900 São Paulo, SP, Brazil; 2 – Instituto Butantan, 05503-900 São Paulo, SP, Brazil. 3 – Grupo de Helminologia e Malacologia Médica, Centro de Pesquisas René Rachou, Fundação Oswaldo Cruz, 30190-002 Belo Horizonte, MG, Brazil; 4 - Département de Biologie Structurale Intégrative, Institut de Génétique et Biologie Moléculaire et Cellulaire (IGBMC), Université de Strasbourg, CNRS, INSERM, 1 rue Laurent Fries, 67404 Illkirch Cedex, France. 5 - Univ. Lille, CNRS, Inserm, CHU Lille, Institut Pasteur de Lille, U1019 UMR 8204CIIL - Centre d'Infection et d'Immunité de Lille, F-59000 Lille, France

\*Corresponding author e-mail: verjo@iq.usp.br

**Table A. Summary information about transcript expression changes for both strands at three different time points after exposure of *S. mansoni* to HDAC inhibitor TSA**

| <b>mRNA and asRNA from the same locus</b>                  | <b>12 h</b> | <b>24 h</b> | <b>48 h</b> |
|------------------------------------------------------------|-------------|-------------|-------------|
| mRNA up-regulated and asRNA up-regulated                   | 635         | 718         | 262         |
| mRNA down-regulated and asRNA down-regulated               | 255         | 104         | 462         |
| mRNA up-regulated and asRNA down-regulated                 | 28          | 40          | 134         |
| mRNA down-regulated and asRNA up-regulated                 | 4           | 8           | 4           |
| mRNA not differentially expressed and asRNA up-regulated   | 401         | 365         | 502         |
| mRNA not differentially expressed and asRNA down-regulated | 66          | 39          | 81          |

|          | 12h_rep1 | 12h_rep2 | 12h_rep3 | 24h_rep1 | 24h_rep2 | 24h_rep3 | 48h_rep1 | 48h_rep2 | 48h_rep3 |
|----------|----------|----------|----------|----------|----------|----------|----------|----------|----------|
| 12h_rep1 | 1        |          |          |          |          |          |          |          |          |
| 12h_rep2 | 0.8837   | 1        |          |          |          |          |          |          |          |
| 12h_rep3 | 0.7472   | 0.8397   | 1        |          |          |          |          |          |          |
| 24h_rep1 | 0.8817   | 0.8575   | 0.7747   | 1        |          |          |          |          |          |
| 24h_rep2 | 0.8279   | 0.7627   | 0.6896   | 0.8616   | 1        |          |          |          |          |
| 24h_rep3 | 0.8594   | 0.8584   | 0.7906   | 0.8739   | 0.8603   | 1        |          |          |          |
| 48h_rep1 | 0.7052   | 0.7703   | 0.6602   | 0.8034   | 0.6875   | 0.7693   | 1        |          |          |
| 48h_rep2 | 0.7943   | 0.7812   | 0.6642   | 0.8504   | 0.8415   | 0.8768   | 0.8405   | 1        |          |
| 48h_rep3 | 0.7264   | 0.6920   | 0.5884   | 0.7866   | 0.7174   | 0.8170   | 0.8082   | 0.8721   | 1        |

**Fig A. Pearson correlation coefficients among replicates calculated with all expressed *S. mansoni* genes present in the microarray.**

Pearson correlation coefficients were calculated using the values of the Log<sub>2</sub> ratio (treated/vehicle) for each gene among the biological replicates (rep1 to rep3) and treatment time points (12h, 24h and 48h), as indicated in the headings of the columns and rows. The shades of red represent the different values along the range of calculated correlation coefficients.

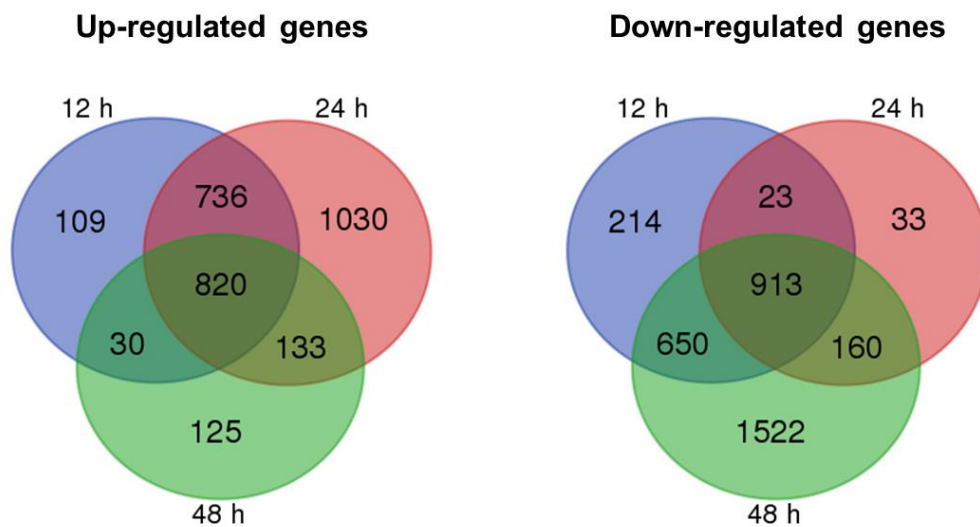

**Fig B. Venn diagrams with the number of up-regulated and down-regulated genes.** The panel at left shows the subset of genes that were up-regulated at the three time points after exposure of schistosomula to HDACi TSA (12, 24 and 48 h), whereas the right panel shows the subset of genes that were down-regulated.

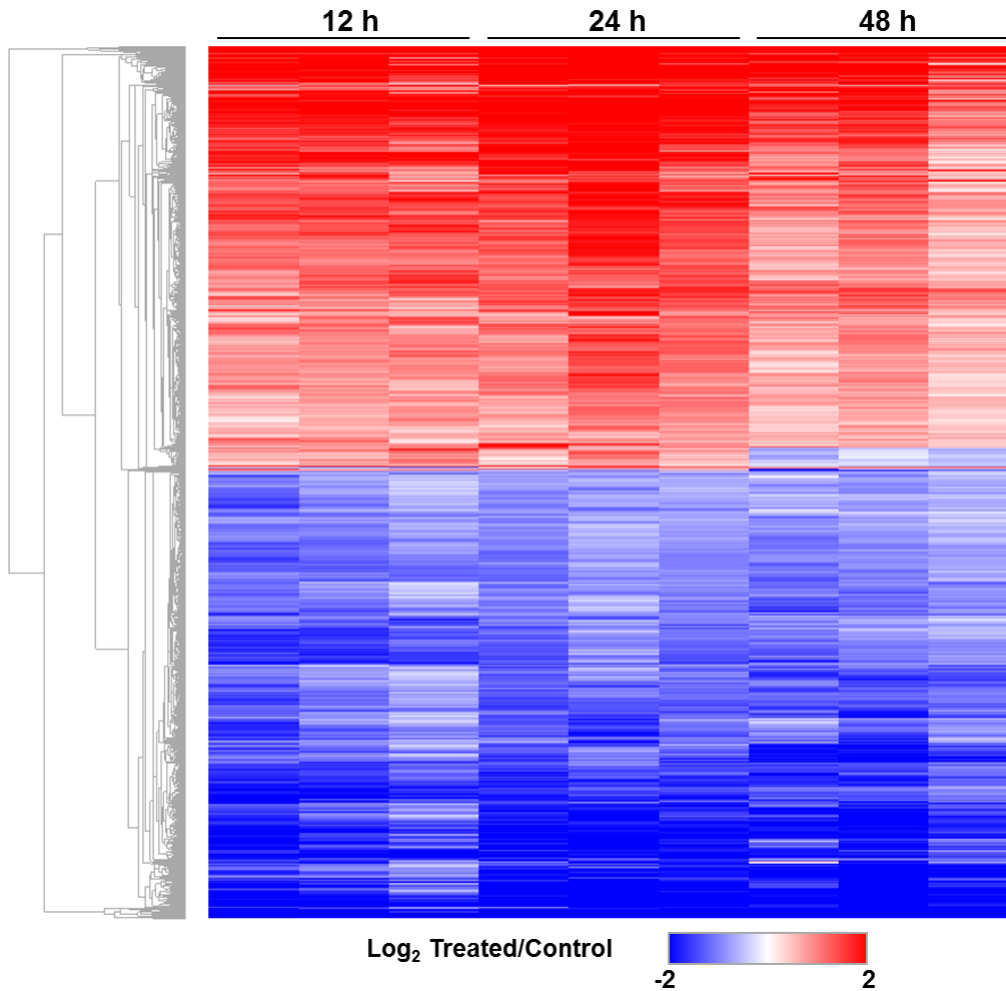

**Fig C. Gene expression profile of 1781 genes affected in common at the three analyzed time points in schistosomula treated with HDACi.**

Heatmap for a total of 1781 differentially expressed genes (each on one horizontal line) that were affected in common at the three different time points after exposure of schistosomula to HDACi TSA (12, 24 and 48 h), as indicated at the top of the heatmap. Three biological replicates (three adjacent columns) were obtained at each time point. Gene expression levels are calculated as  $\text{Log}_2$  ratio (treated/vehicle) and color-coded as indicated on the scale at the bottom.

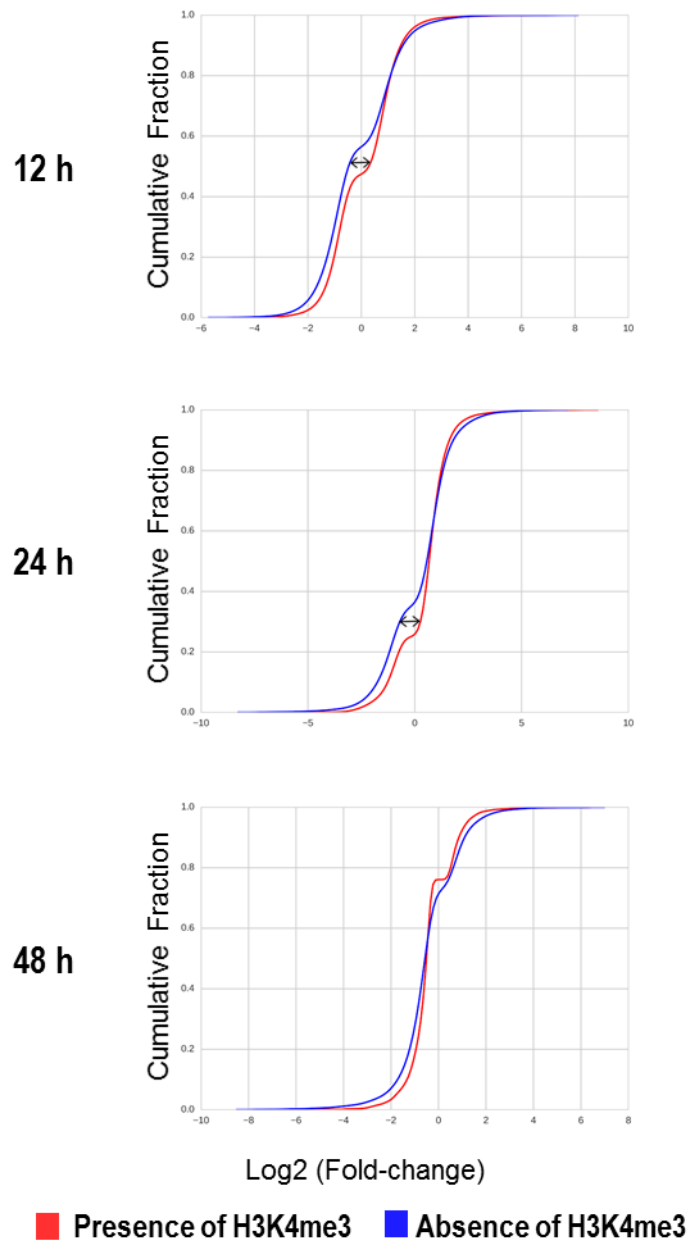

**Fig D. Cumulative distribution function of expression fold-changes for all differentially expressed genes separated per the presence or absence of histone mark H3K4me3.**

Gene expression fold-change ( $\log_2$ ) of differentially expressed genes that were separated into two groups according to the presence (red line) or absence (blue line) of histone mark H3K4me3 at their TSSs. Internal black arrow points to the difference between the two analyzed groups, highlighting a shift towards the right in the cumulative distribution of gene expression changes at 12 and 24 h, for the genes with the presence of the H3K4me3 mark at their promoter regions, compared with genes without this histone mark.

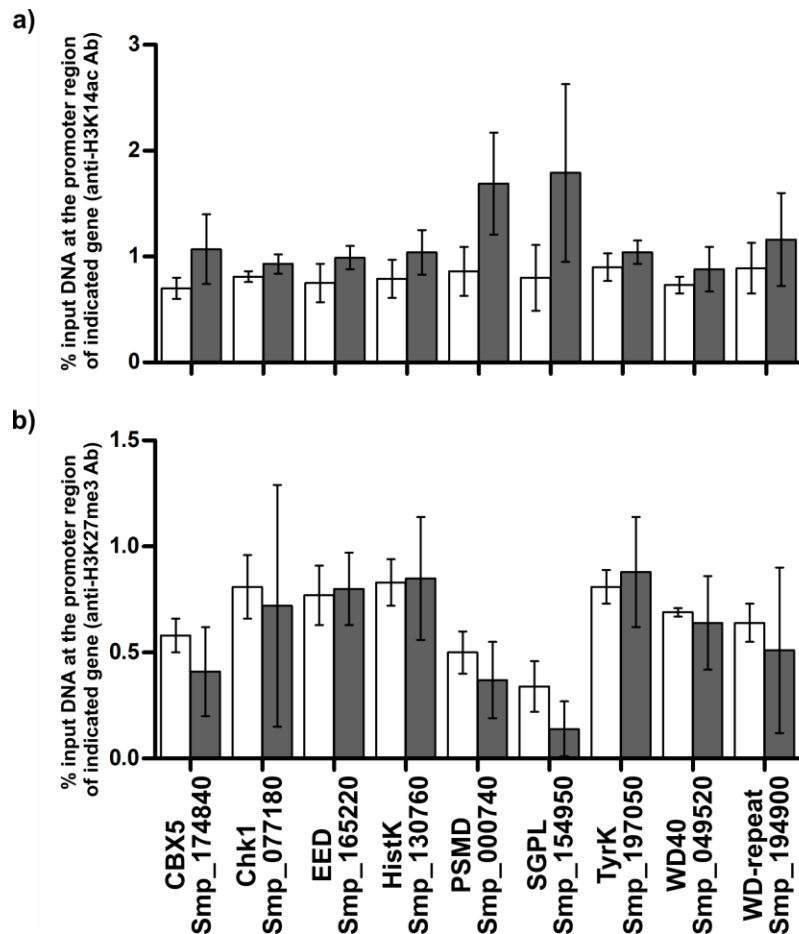

**Fig E. ChIP-qPCR targeting the H3K14ac and H3K27me3 histone marks at the promoter regions of differentially expressed genes.**

Chromatin immunoprecipitation (ChIP) was performed with antibodies anti-H3K14ac (panel a) or anti-H3K27me3 (panel b) in schistosomula treated for 12 h with 1  $\mu$ M TSA (solid bars) or with vehicle (open bars) and the DNA from the promoter regions of the indicated selected genes that was co-immunoprecipitated was quantified by qPCR with specific primers. Results are presented as % input DNA at the indicated target promoter region normalized by % input DNA at the promoter of the non-expressed reference gene *SmVal19* (Smp\_123090), as described in the Methods. Three independent biological replicates were analyzed. Statistical significance of enrichment was evaluated using t-test; asterisk indicates  $p$ -value  $\leq 0.05$ .

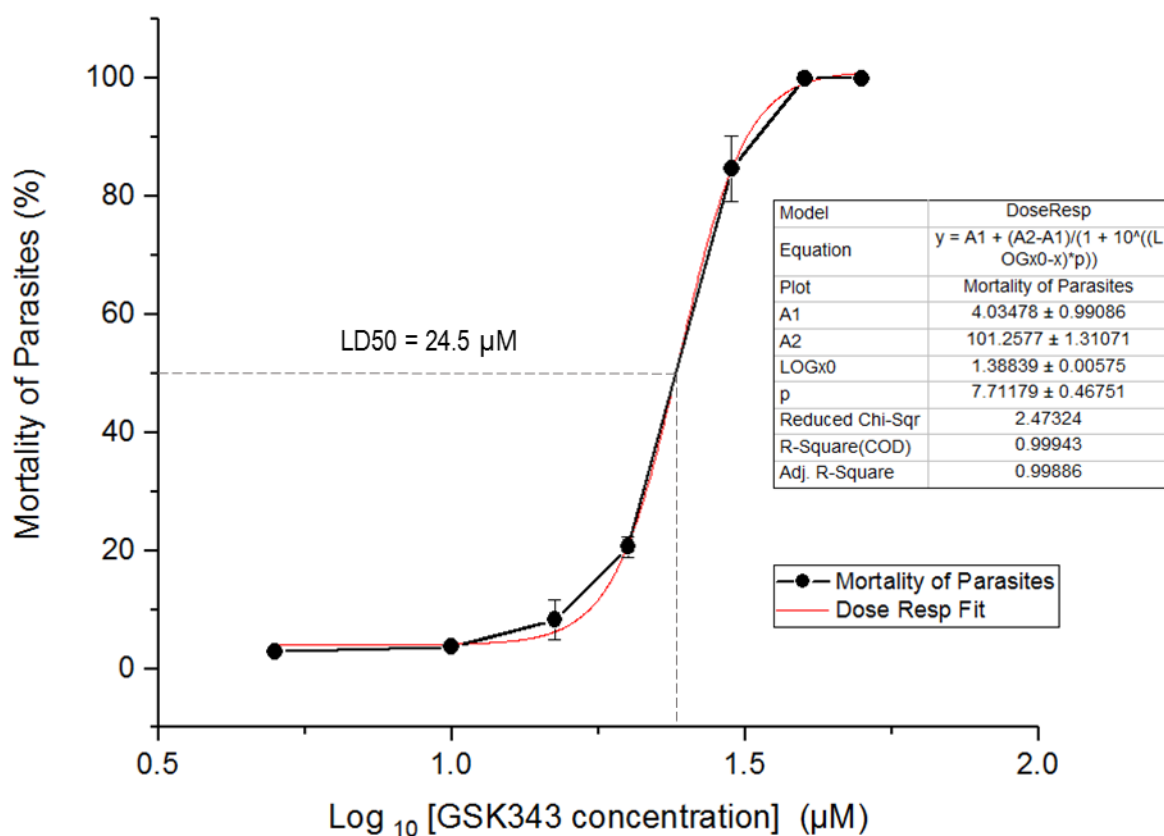

**Fig F. Median lethal dose LD50 for the EZH2 inhibitor GSK343 in schistosomula.**

Median lethal dose LD50 was determined as the concentration of GSK343 that caused 50 % of schistosomula parasites in *in vitro* culture to die after 96 hours treatment. LD50 was calculated using seven GSK343 doses (5 µM, 10 µM, 15 µM, 20 µM, 30 µM, 40 µM and 50 µM); for each concentration, over 200 parasites were observed in a Petri dish in the microscope with visible light and UV light, photographed and counted as alive or dead. Dead parasites were stained with propidium iodide and detected as red images under UV light. The percentage of dead parasites (mortality of parasites) was calculated from the images countings. Three biological replicates were obtained and the values (black circles) represent the mean  $\pm$  S.D. A sigmoidal function has been fitted to the points (red curve) and an adjusted coefficient of determination (COD) adjusted R<sup>2</sup>-value > 0.99 was calculated; the fitted LD50 =  $10^{1.38839} = 24.5$  µM.



```

SmEZH2 HHYHPCDHFGQRCDSDSCSRIAGTFCEKFCQCPDPCPNRFLGCRCRGQCNTKLCPCVLAV 805
4MI0 --YQPCDHFRQPCDSSCPCVIAQNFCEKFCQCSSECQNRFPGCRCKAQCNTKQPCPYLAV 58
4MI5 GSLQPCDHFRQPCDSSCPCVIAQNFCEKFCQCSSECQNRFPGCRCKAQCNTKQPCPYLAV 60
      :***** * **, ** * ** .***** :* *** ***, :***** ** **

SmEZH2 RECDPDLCLSCGAHSSFRSFASGNSMDLLSLLQTTLPVVTGTTCRNVAIQRGWRKHLMLAP 865
4MI0 RECDPDLCLTCGAADHWDSK-----NVSCKNCSIQRGSKKHLMLAP 99
4MI5 RECDPDLCLTCGAADHWDSK-----NVSCKNCSIQRGSKKHLMLAP 101
      *****:*** . : * . :*: * :**** :****:***

SmEZH2 SDVAGWGIFIKEAAEKNDFIYEYCGEIIISQDEADRRGKIYDKTMSSFLFNLNRFVVDAT 925
4MI0 SDVAGWGIFIKDPVQKNEFISEYCGEIIISQDEADRRGKVYDKYMCSFLFNLNRFVVDAT 159
4MI5 SDVAGWGIFIKDPVQKNEFISEYCGEIIISQDEADRRGKVYDKYMCSFLFNLNRFVVDAT 161
      *****: .:***:*** *****:*** *.*****.*****

SmEZH2 RKGNKIRFANHSVNPNCCHAKVIMVNGDHRIGIFAKRAILPGEELFFDYRYGPT----- 978
4MI0 RKGNKIRFANHSVNPNCYAKVMMVNGDHRIGIFAKRAIQTGEELFFDYRYSQADALKYVG 219
4MI5 RKGNKIRFANHSVNPNCYAKVMMVNGDHRIGIFAKRAIQTGEELFFDYRYSQADALKYVG 221
      *****:***:***** *****. :

SmEZH2 ----- 978
4MI0 IEREMEIPHHHHH 233
4MI5 IEREMEIP----- 229

```

**Fig G. Alignment of amino acid sequences from the SmEZH2 SET domain and from two models of hEZH2.**

Multiple sequence alignment of SmEZH2 with hEZH2 models (4MI0 and 4MI5) used to perform the modeling. Amino acid numbers refer to the SmEZH2 full sequence.

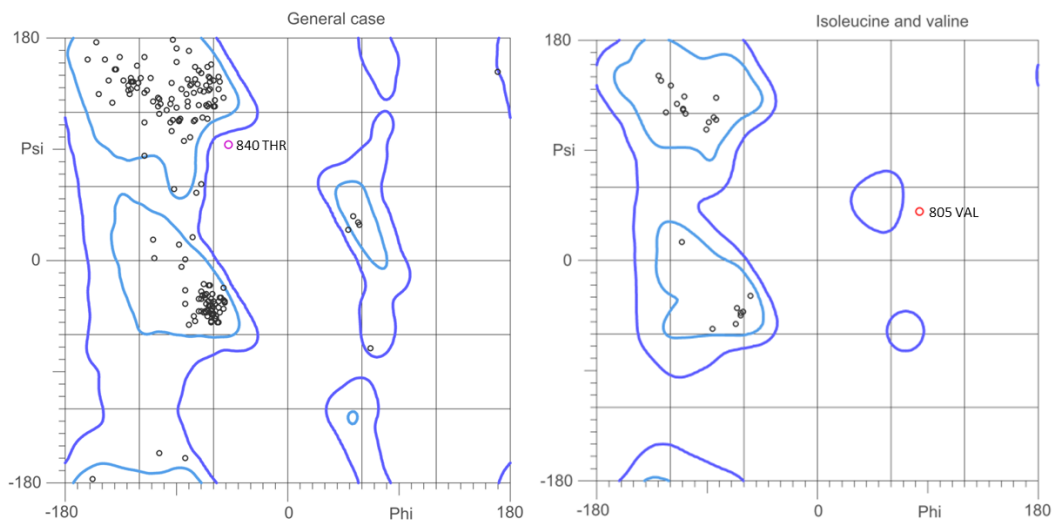

**Fig H. Ramachandran plots of SmeZH2 3D model.**

Ramachandran plot of amino acids from 746 - 978 of refined SmeZH2 SET domain model with 95.7% (221/233) of residues in favored regions indicated by light blue and 99.1% (229/233) of residues in allowed regions indicated by dark blue, as analyzed by Molprobit. There were 2 outliers (phi, psi): 840 THR (-48.7, 94.5) indicated in a pink circle at the general case plot and 805 VAL (83.5, 40.3) indicated in a red circle at the isoleucine and valine plot.

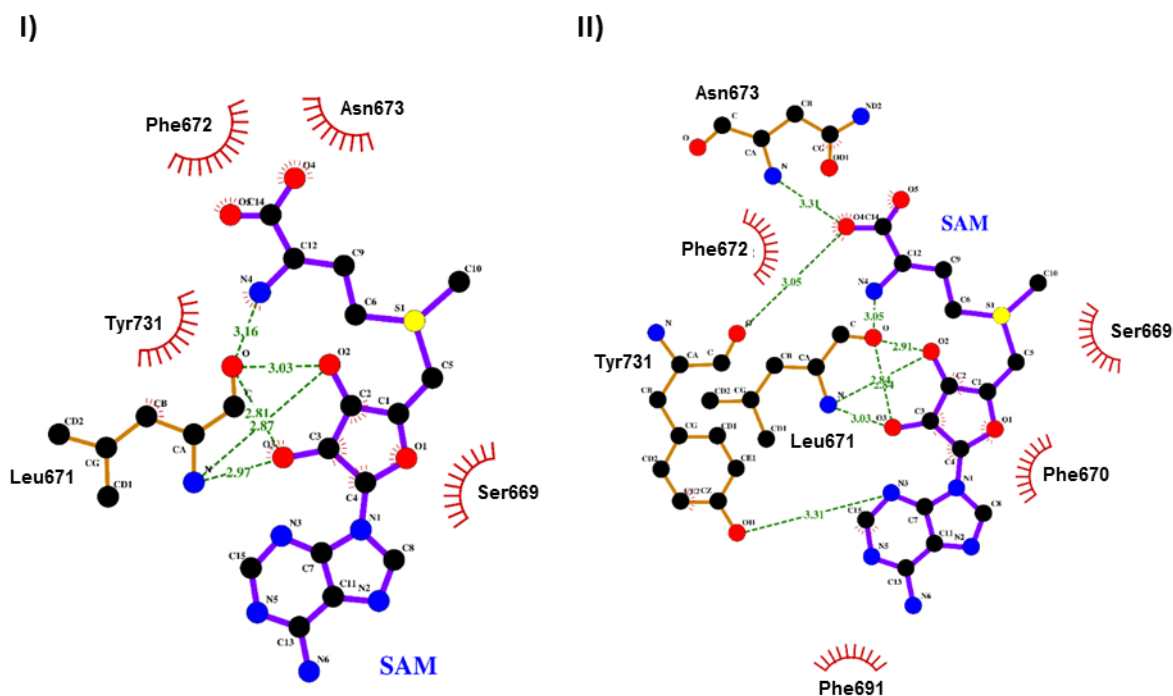

**Fig I. Two-dimensional schematic of specific structural amino acids of hEZH2 models with interactions and ligands.**

Two-dimensional schematic overview of structural interactions, showing amino acids that interact with cofactor SAM, taken from hEZH2 structural models 4MI0 (I) and 4MI5 (II). A red arc represents hydrophobic contacts with spokes radiating towards the ligand atoms they contact, and hydrogen bonds indicated by green dashed lines between the atoms involved.
