# Supplementary material for: Histone deacetylase inhibition modulates histone acetylation at gene promoter regions and affects genome-wide gene transcription in Schistosoma mansoni
Source: PLoS Negl Trop Dis. 2017 Apr 13;11(4):e0005539. doi: 10.1371/journal.pntd.0005539 (PMC5404884; doi:10.1371/journal.pntd.0005539)
Supplement: S1 Table — (XLSX) [file pntd.0005539.s001.xlsx]

## Sheet: Plan1
S1 Table: List of primers used in qPCR and ChIP-qPCR
Primers used in RT-qPCR for validation of differentially expressed genes
Smp gene	Primer	Sequence
CBX5 Smp_174840	Forward	GGAAGTGATGCGATTGAACC
	Reverse	CCTGGTGAATAACAACCAAAGTC
Chk1 Smp_077180	Forward	AATGAAGCCCACTGAAGTTTG
	Reverse	CCAGGGTAGTCTTAAAACTGTTCAA
EED Smp_165220	Forward	TTTGTTTATTGTCGAACCTTGG
	Reverse	AGAATTGCTGGAATGCTACAAA
HistK Smp_130760	Forward	TCGAGACAAATTTGCTGACAAT
	Reverse	TGAAATTGACCATCCAGATCC
PSMD Smp_000740	Forward	GGAAGTAATGCACCAAGGTAAA
	Reverse	CCAAACAATGCCGAAAATAAA
SGPL Smp_154950	Forward	TGCAATGGATTTGTCCAGAG
	Reverse	GCGTATGCTGATGATGACGA
TyrK Smp_197050	Forward	TGCTGTTTAACTGACGTTGGA
	Reverse	AAAGTGACCAAGCGAGAGGA
WD40 Smp_049520	Forward	TTCAGTCAACGAGCTTAGGTCA
	Reverse	CATTAGGCACGTAAGGAGTTGAG
WD-repeat Smp_194900	Forward	GGCAAACTCTCCATGCAAAT
	Reverse	CGCGGTATCCATACCATCTG
Val19 Smp_123090	Forward	TCACAGAATGATTTCCTATGATTGA
	Reverse	AAGACGTAGTTCCCTAATACTTTACAA
Primers used in ChIP-qPCR
Smp gene	Primer	Sequence
CBX5 Smp_174840	Forward	CAGGCGTTTCCTTGATAAGC
	Reverse	CAGGTGCTAGACCACGATCA
Chk1 Smp_077180	Forward	AGGTCATTCGAGCTGTCGTT
	Reverse	TCCTGGATGCTCTGGAGTTT
EED Smp_165220	Forward	TTAATTACCGCTCACGTTCG
	Reverse	ACGGGCACAGTCCACATAAT
EZH2 Smp_078900	Forward	CGAGATTTTGTTGTGGATGC
	Reverse	CGATGATCACCATTCACCAT
HistK Smp_130760	Forward	TGCATTTTAGAATCTGCTGTCAA
	Reverse	AGAGATAGGCTTTCGCCAATA
SET Smp_160700	Forward	TCTGGTCGAGAGGAATTTGAA
	Reverse	CATGATGCCAAGCTGATTGT
SGPL Smp_154950	Forward	TGTGCAGAACGATTTATTCAAGA
	Reverse	CGATCCGGTATCATTTGAGAT
Sirt2 Smp_084140	Forward	ATTTTGGTCGGGTAATGCTG
	Reverse	AGCGAGAGTCCGTTTCCTTT
TyrK Smp_197050	Forward	TTCACGATTGATTGGGAACA
	Reverse	TCACCTACCATCAGTGTATTTTCG
WD40 Smp_049520	Forward	CAGCATCCACTGATTGTTCTG
	Reverse	GGACTATAACGAGCGCACCA
WD-repeat Smp_194900	Forward	CCTTGAATTCTGGACCGATG
	Reverse	TCATACATCGATTGCCCAAA
PSMD Smp_000740	Forward	GCATGCGTCAAGAACATGAG
	Reverse	GCATAGCTTCTTCGGACGTT
